# Supplementary material for: Antibacterial Activity of Manuka Honey Against Azithromycin Resistant Extensively Drug Resistant Salmonella Typhi Clinical Isolates: In-Vitro Study
Source: Research Square preprint supplement (doi:10.21203/rs.3.rs-1144473/v1), 2022-01-13
Supplement: Supplementary file 1 [file 9e29e0ad0ff5bba678ab2a08.xlsx]

## Sheet: Sheet1
MIC ug/mL	No Of isolates
0.03	0
0.06	0
0.125	0
0.25	0
0.5	0
1	0
2	92
4	50
8	0
16	5
32	3
